# Supplementary material
Source: Springer Nature journal article supplement (https://www.springermedizin.de/resource/supplementary/12872_2014_789_MOESM2_ESM.pdf/9430500)

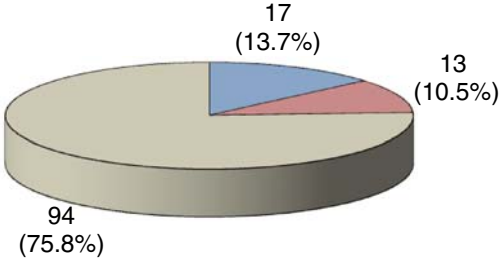

Autopsy done

No autopsy

Autopsy unknown

Supplement: MOESM2 [file 9430500]
